# Supplementary material for: Morphometric analysis of inflammation in bronchial biopsies following exposure to inhaled diesel exhaust and allergen challenge in atopic subjects
Source: PubMed Central journal article supplement (PMC4711081; doi:10.1186/s12989-016-0114-z), 2016-01-13
Supplement: 12989_2016_114_MOESM1_ESM.pdf [file 12989_2016_114_MOESM1_ESM.pdf]

**Additional file 1**

**Table S1.** Pearson correlation coefficients matrix for inflammatory biomarkers' expression in the lung submucosa measured after FAS (filtered air + saline) condition (upper part), and DES (diesel exhaust + saline) condition (lower part).

| Variable     | AA1               | ECP               | CD4               | IL-4              | CD138                       | NE                |
|--------------|-------------------|-------------------|-------------------|-------------------|-----------------------------|-------------------|
| <b>AA1</b>   | <b>1</b>          | 0.15<br>(p=0.67)  | 0.21<br>(p=0.55)  | 0.23<br>(p=0.51)  | -0.07<br>(p=0.84)           | 0.05<br>(p=0.88)  |
| <b>ECP</b>   | 0.02<br>(p=0.94)  | <b>1</b>          | 0.02<br>(p=0.95)  | -0.26<br>(p=0.45) | 0.08<br>(p=0.80)            | -0.18<br>(p=0.60) |
| <b>CD4</b>   | 0.20<br>(p=0.56)  | 0.37<br>(p=0.29)  | <b>1</b>          | -0.17<br>(p=0.63) | 0.23<br>(p=0.51)            | 0.38<br>(p=0.27)  |
| <b>IL-4</b>  | 0.46<br>(p=0.17)  | -0.31<br>(p=0.37) | -0.15<br>(p=0.67) | <b>1</b>          | 0.53<br>(p=0.88)            | 0.37<br>(p=0.28)  |
| <b>CD138</b> | -0.09<br>(p=0.79) | 0.04<br>(p=0.90)  | 0.56<br>(p=0.09)  | -0.25<br>(p=0.48) | <b>1</b>                    | 0.13<br>(p=0.18)  |
| <b>NE</b>    | -0.01<br>(p=0.97) | 0.20<br>(p=0.56)  | 0.32<br>(p=0.36)  | -0.01<br>(p=0.96) | 0.76<br><b>(p&lt;0.01)*</b> | <b>1</b>          |

AA1=tryptase; ECP=eosinophil cationic protein; NE=neutrophil elastase; \*p<0.05.

**Table S2.** Pearson correlation coefficients matrix for inflammatory biomarkers' expression in the lung submucosa measured after FAA (filtered air + allergen) condition (upper part) and DEA (diesel exhaust + allergen) condition (lower part).

| Variable     | AA1               | ECP               | CD4               | IL-4                        | CD138                       | NE                 |
|--------------|-------------------|-------------------|-------------------|-----------------------------|-----------------------------|--------------------|
| <b>AA1</b>   | <b>1</b>          | 0.07<br>(p=0.84)  | -0.19<br>(p=0.58) | -0.30<br>(p=0.40)           | 0.64<br><b>(p&lt;0.04)*</b> | -0.005<br>(p=0.99) |
| <b>ECP</b>   | 0.07<br>(p=0.84)  | <b>1</b>          | -0.26<br>(p=0.45) | 0.61<br><b>(p&lt;0.05)*</b> | -0.38<br>(p=0.27)           | 0.32<br>(p=0.35)   |
| <b>CD4</b>   | -0.44<br>(p=0.20) | -0.42<br>(p=0.22) | <b>1</b>          | -0.31<br>(p=0.36)           | -0.06<br>(p=0.86)           | -0.09<br>(p=0.80)  |
| <b>IL-4</b>  | 0.33<br>(p=0.34)  | -0.23<br>(p=0.51) | 0.23<br>(p=0.51)  | <b>1</b>                    | -0.34<br>(p=0.33)           | -0.23<br>(p=0.51)  |
| <b>CD138</b> | -0.25<br>(p=0.48) | -0.37<br>(p=0.28) | 0.54<br>(p=0.10)  | 0.19<br>(p=0.58)            | <b>1</b>                    | -0.33<br>(p=0.34)  |
| <b>NE</b>    | 0.14<br>(p=0.68)  | -0.21<br>(p=0.55) | 0.38<br>(p=0.27)  | 0.16<br>(p=0.65)            | -0.13<br>(p=0.72)           | <b>1</b>           |

AA1=tryptase; ECP=eosinophil cationic protein; NE=neutrophil elastase; \*p<0.05.
