# Supplementary material for: Morphometric analysis of inflammation in bronchial biopsies following exposure to inhaled diesel exhaust and allergen challenge in atopic subjects
Source: PubMed Central journal article supplement (PMC4711081; doi:10.1186/s12989-016-0114-z), 2016-01-13

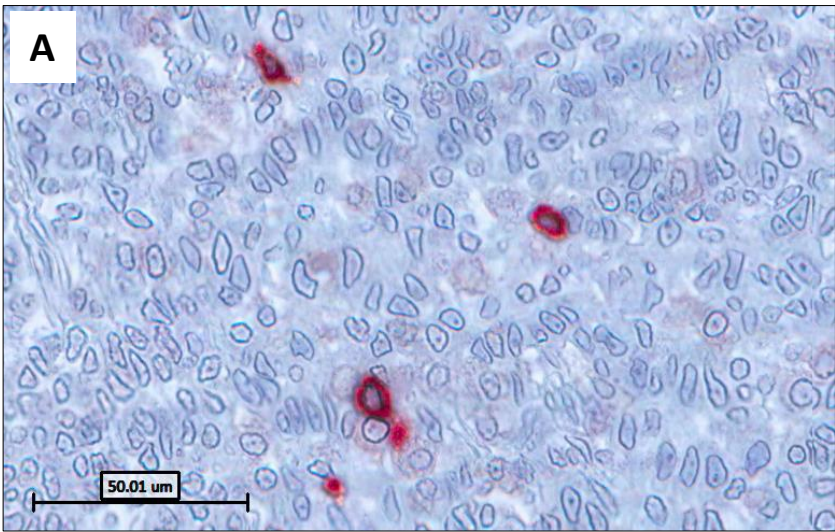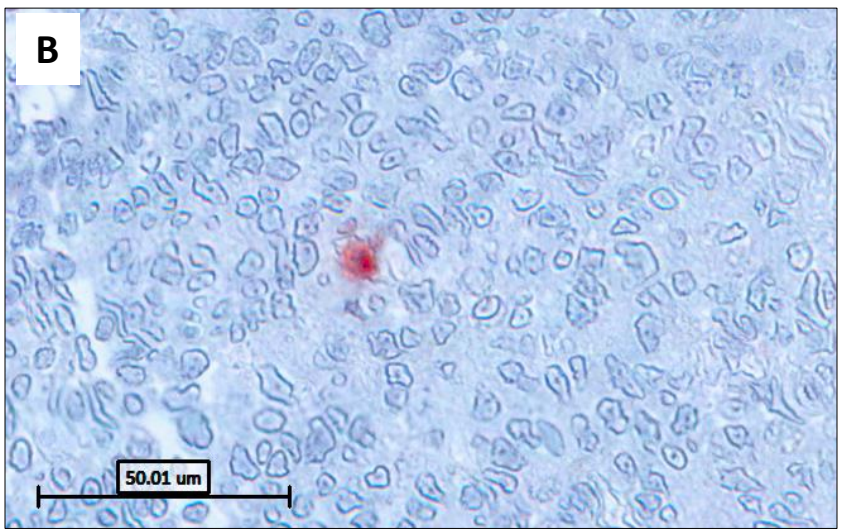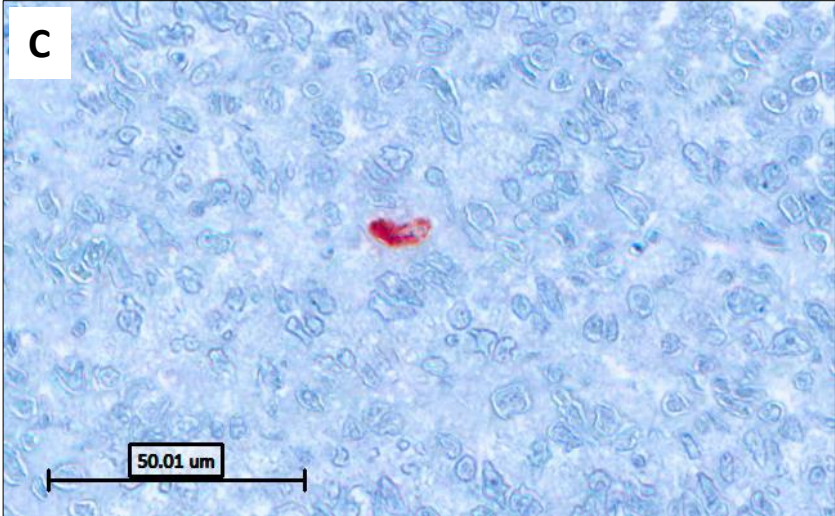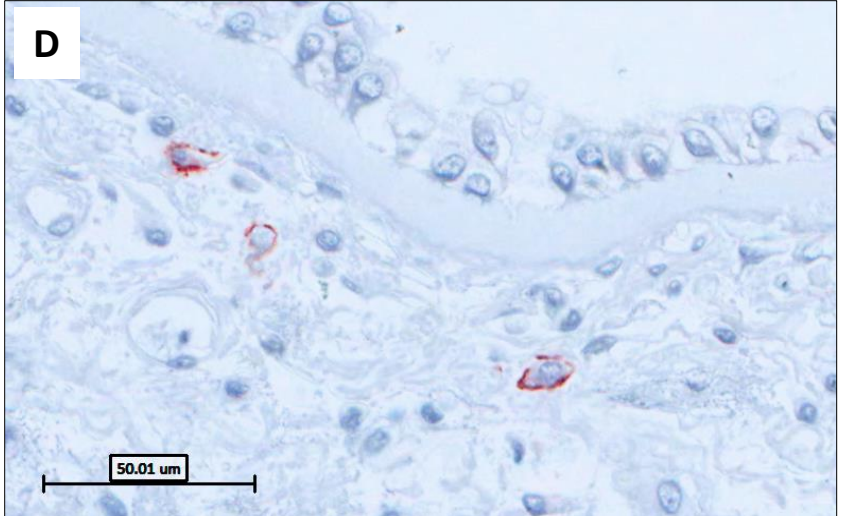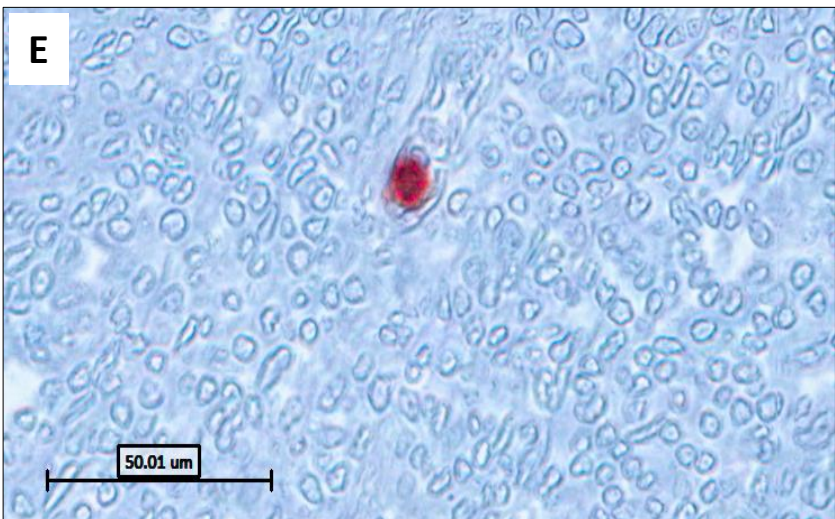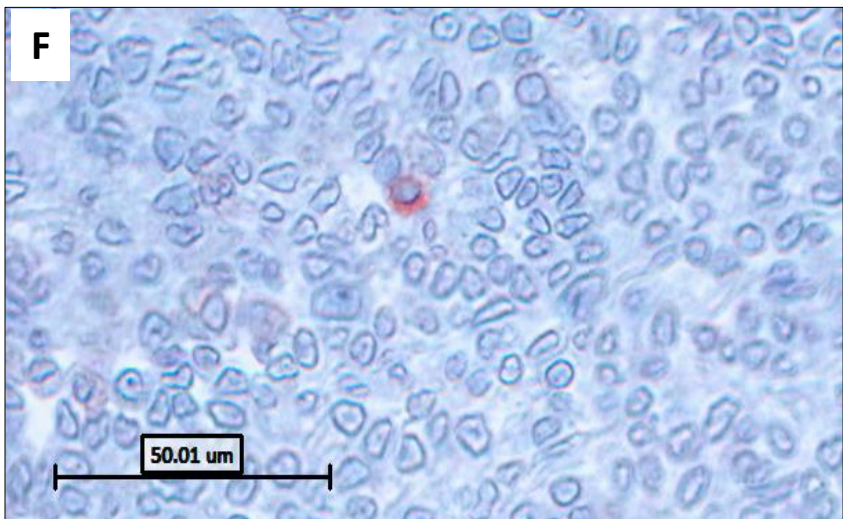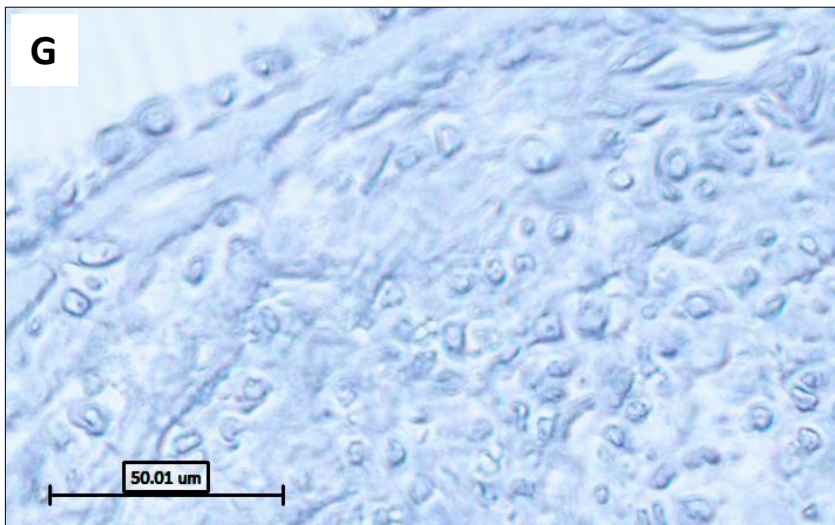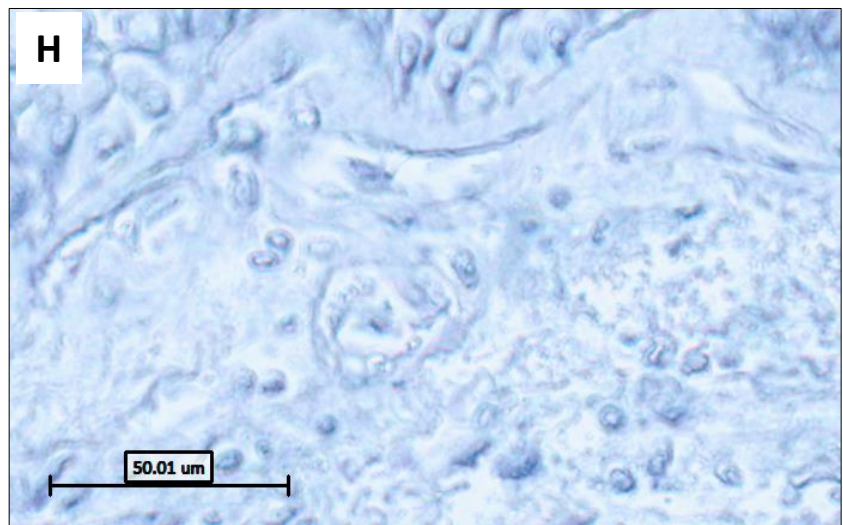

Supplement: 12989_2016_114_MOESM2_ESM.pdf [file 12989_2016_114_MOESM2_ESM.pdf]
